# Supplementary material for: Determinants for Participation in Human Papillomavirus Self-Sampling among Nonattenders to Cervical Cancer Screening in Denmark
Source: Oxford University Press journal article supplement (doi:10.1158/1055-9965.epi-18-0480), 2018-08-14
Supplement: 10559965epi180480-sup-201158_2_supp_4933068_pcs41b.docx [file 10559965epi180480-sup-201158_2_supp_4933068_pcs41b.docx]

| **Table S1. Association between screening history and accepting HPV self-sampling among non-participants to routine cervical cancer screening in the Danish Capital Region invited for HPV self-sampling in the Copenhagen Self-sampling Initiative Study, 2014−2015. Women aged ≥34 years at invitation (n=17,348).** | | | | | | |
| --- | --- | --- | --- | --- | --- | --- |
|  | **n** | **(% self-sampling participants)** | **OR** | **95% CI** | **OR1** | **95% CI** |
| **Intermittently screened** | 7,966 | (30.1) | 1 |  | 1 |  |
| **Long-term unscreened** | 9,382 | (16.9) | 0.47 | (0.44−0.51) | 0.49 | (0.45−0.53) |
| 1Adjusted for age, country of origin, education, marital status and income. | | | | | | |
| CI, confidence interval; OR, odds ratio. | | | | | | |
