# Supplementary material for: Determinants for Participation in Human Papillomavirus Self-Sampling among Nonattenders to Cervical Cancer Screening in Denmark
Source: Oxford University Press journal article supplement (doi:10.1158/1055-9965.epi-18-0480), 2018-08-14
Supplement: 10559965epi180480-sup-201158_2_supp_4933069_pcs41b.docx [file 10559965epi180480-sup-201158_2_supp_4933069_pcs41b.docx]

**Table S2. Characteristics of women who did and did not return a questionnaire among women invited for self-sampling in the Copenhagen Self-sampling initiative, 2014−2015 (n=21,314).**

|  |  | **Returned questionnaire** | | **Did not return questionnaire** | |
| --- | --- | --- | --- | --- | --- |
|  |  | **(n=3,707)** | | **(n=17,607)** | |
|  |  | **n** | **(%)** | **n** | **(%)** |
| **Sociodemographic characteristics** | |  |  |  |  |
|  | **Age at invitation (years)** |  |  |  |  |
|  | 27−29 | 242 | ( 6.5) | 1,614 | ( 9.2) |
|  | 30−39 | 830 | (22.4) | 4,165 | (23.7) |
|  | 40−49 | 924 | (24.9) | 4,153 | (23.6) |
|  | 50−59 | 1,009 | (27.2) | 4,353 | (24.7) |
|  | 60−65 | 702 | (18.9) | 3,322 | (18.9) |
|  | **Marital status (in the year of invitation)** |  |  |  |  |
|  | Married | 1,721 | (46.4) | 7,354 | (41.8) |
|  | Unmarried | 1,267 | (34.2) | 6,637 | (37.7) |
|  | Divorced/widowed | 719 | (19.4) | 3,616 | (20.5) |
|  | **Educational level (in the year of invitation)1** |  |  |  |  |
|  | Basic | 658 | (18.7) | 4,362 | (27.9) |
|  | Medium | 1,275 | (36.1) | 5,731 | (36.7) |
|  | High | 1,594 | (45.2) | 5,534 | (35.4) |
|  | **Income (in the year of invitation)1** |  |  |  |  |
|  | Q1 (< € 18217) | 578 | (15.6) | 4,609 | (26.2) |
|  | Q2 (€ 18217−26213) | 746 | (20.1) | 4,580 | (26.1) |
|  | Q3 (€ 26213−35408) | 1,049 | (28.3) | 4,369 | (24.8) |
|  | Q4 (> € 35408) | 1,334 | (36.0) | 4,048 | (23.0) |
|  | **Country of origin 1** |  |  |  |  |
|  | Denmark | 3,173 | (85.6) | 12,038 | (68.4) |
|  | Western countries | 277 | ( 7.5) | 1,647 | ( 9.4) |
|  | Non-western countries | 257 | ( 6.9) | 3,921 | (22.3) |
|  |  |  |  |  |  |
| **Mental health2** | |  |  |  |  |
|  | **Intoxicant abuse** |  |  |  |  |
|  | Never | 3,597 | (97.0) | 17,032 | (96.7) |
|  | Ever | 110 | ( 3.0) | 575 | ( 3.3) |
|  | **Schizophrenia and other psychoses** |  |  |  |  |
|  | Never | 3,656 | (98.6) | 17,076 | (97.0) |
|  | Ever | 51 | ( 1.4) | 531 | ( 3.0) |
|  | **Affective disorders** |  |  |  |  |
|  | Never | 3,524 | (95.1) | 16,535 | (93.9) |
|  | Ever | 183 | ( 4.9) | 1,072 | ( 6.1) |
|  | **Anxiety, adjustment disorders, and OCD** |  |  |  |  |
|  | Never | 3,415 | (92.1) | 15,938 | (90.5) |
|  | Ever | 292 | ( 7.9) | 1,669 | ( 9.5) |
|  | **Eating disorders** |  |  |  |  |
|  | Never | 3,673 | (99.1) | 17,422 | (98.9) |
|  | Ever | 34 | ( 0.9) | 185 | ( 1.1) |
|  |  |  |  |  |  |
| **Physical health2** | |  |  |  |  |
|  | **HPV vaccination status** |  |  |  |  |
|  | Never | 3,533 | (95.3) | 16,774 | (95.3) |
|  | Ever | 174 | ( 4.7) | 833 | (4.7) |
|  | **Previous cancer diagnosis (any cancer)** |  |  |  |  |
|  | Never | 3,481 | (93.9) | 16,937 | (96.2) |
|  | Ever | 226 | ( 6.1) | 670 | ( 3.8) |
|  | **Charlson comorbidity index** |  |  |  |  |
|  | 0 | 2,963 | (79.9) | 14,135 | (80.3) |
|  | 1 | 417 | (11.2) | 1,958 | (11.1) |
|  | ≥2 | 327 | ( 8.8) | 1,514 | ( 8.6) |

1Numbers do not add up to the total due to missing values.

2Measured as "never/ever" at the time of study start.

HPV, human papillomavirus; OCD, obsessive compulsive disorder
